# Supplementary material
Source: PubMed Central journal article supplement (PMC10019174)
Supplement: aac.00759-22-s0001.pdf [file aac.00759-22-s0001.pdf]

## Supplementary Information

**Title:** Organoselenium has potent fungicidal effect on *Cryptococcus neoformans* and inhibits the virulence factors

**Running title:** Organoselenium: a fungicidal and anti-virulence compound

**Authors:** Daniel Felipe Freitas DE JESUS<sup>a</sup>, Aline Luiza Duarte DE FREITAS<sup>a</sup>, Isadora Maria DE OLIVEIRA<sup>b</sup>, Larissa Costa DE ALMEIDA<sup>a</sup>, Rafael Wesley BASTOS<sup>c</sup>, Cristina de Castro SPADARI<sup>a</sup>, Analy Sales de Azevedo MELO<sup>d</sup>, Daniel de Assis SANTOS<sup>e</sup>, Letícia Veras COSTA-LOTUFO<sup>a</sup>; Flavia C. G. REIS<sup>f,g</sup>; Marcio L. RODRIGUES<sup>f,h</sup>; Hélio Alexandre STEFANI<sup>b</sup>, Kelly ISHIDA<sup>a,\*</sup>

**Affiliations:** <sup>a</sup> Institute of Biomedical Sciences, University of São Paulo, São Paulo, Brazil (USP); <sup>b</sup>School of Pharmaceutical Sciences, University of São Paulo (USP), São Paulo, Brazil; <sup>c</sup> Center of Biosciences, Federal University of Rio Grande do Norte (UFRN), Natal, Brazil; <sup>d</sup> Department of Medicine, Federal University of São Paulo (UNIFESP), São Paulo, Brazil; <sup>e</sup>Institute of Biomedical Sciences, Federal University of Minas Gerais (UFMG), Belo Horizonte, Brazil; <sup>f</sup>Carlos Chagas Institute, Oswaldo Cruz Foundation, Curitiba, Brazil; <sup>g</sup>Center for Technological Development in Health (CDTS), Oswaldo Cruz Foundation, Rio de Janeiro, Brazil; <sup>h</sup>Institute of Microbiology Paulo de Góes, Federal University of Rio de Janeiro (UFRJ), Rio de Janeiro, Brazil

**#Correspondence:** Kelly Ishida, Laboratory of Antifungal Chemotherapy, Department of Microbiology, Institute of Biomedical Sciences, University of São Paulo, Prof. Lineu Prestes Avenue, 1374 – 05508-000, ICB II, Lab 150, São Paulo, SP, Brazil. Phone: +55(11)30917204, E-mail: [ishidakelly@usp.br](mailto:ishidakelly@usp.br)

**Table S1.** Antifungal activity of synthetic compounds against *Aspergillus fumigatus* ATCC 16913, *Candida albicans* SC5314 and *Candida neoformans* H99 and hemolytic activity on red blood cells.

| Compound | Molecular structure | IC <sub>50</sub> /IC <sub>90</sub> /MFC (µg/mL) |                         |                              | HA <sub>50</sub><br>(µg/mL) |
|----------|---------------------|-------------------------------------------------|-------------------------|------------------------------|-----------------------------|
|          |                     | <i>Cryptococcus neoformans</i>                  | <i>Candida albicans</i> | <i>Aspergillus fumigatus</i> |                             |
| 1        |                     | >128                                            | >128                    | >128                         | nd                          |
| 2        |                     | 4/8/16                                          | 8/16/32                 | >128                         | >128                        |
| 3        |                     | >128                                            | >128                    | >128                         | nd                          |
| 4        |                     | >128                                            | >128                    | >128                         | nd                          |
| 5        |                     | 4/8/16                                          | 64/>128/>128            | >128                         | >128                        |
| 6        |                     | >128                                            | >128                    | >128                         | nd                          |

|    |                                                                                     |             |              |      |      |
|----|-------------------------------------------------------------------------------------|-------------|--------------|------|------|
| 7  | 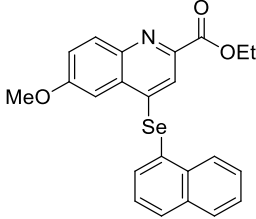   | >128        | >128         | >128 | nd   |
| 8  |    | >128        | >128         | >128 | nd   |
| 9  |    | 16/64/128   | 64/>128/>128 | >128 | >128 |
| 10 |   | >128        | >128         | >128 | nd   |
| 11 |  | >128        | >128         | >128 | nd   |
| 12 |  | 32/64/>128  | >128         | >128 | nd   |
| 13 |  | 64/128/>128 | >128         | >128 | nd   |
| 14 |  | 16/128/>128 | >128         | >128 | >128 |
| 15 |  | >128        | >128         | >128 | nd   |

|    |                                                                                     |              |              |      |      |
|----|-------------------------------------------------------------------------------------|--------------|--------------|------|------|
| 16 | 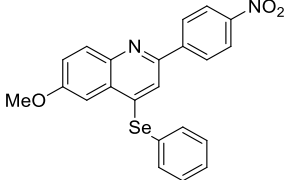   | 16/32/>128   | >128         | >128 | >128 |
| 17 |    | >128         | >128         | >128 | nd   |
| 18 |    | >128         | >128         | >128 | nd   |
| 19 |    | >128         | >128         | >128 | nd   |
| 20 |   | 64/>128/>128 | >128         | >128 | nd   |
| 21 |  | >128         | >128         | >128 | nd   |
| 22 |  | 4/8/>128     | 16/>128/>128 | 128  | >128 |
| 23 |  | >128         | >128         | >128 | nd   |

|    |                                                                                    |         |      |      |      |
|----|------------------------------------------------------------------------------------|---------|------|------|------|
| 24 | 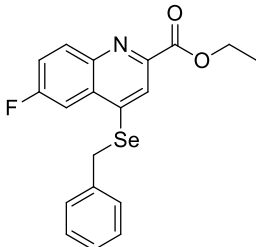  | 8/32/32 | >128 | >128 | >128 |
| 25 |   | 8/16/32 | >128 | >128 | >128 |
| 26 |   | >128    | >128 | >128 | nd   |
| 27 |  | >128    | >128 | >128 | nd   |

IC<sub>50</sub>, the lowest concentration that inhibits 50% of fungal growth

IC<sub>90</sub>, the lowest concentration that inhibits 90% of fungal growth

MFC, the lowest concentration that kills >99.9% of yeasts

HA<sub>50</sub>, the lowest concentration that leads to 50 % hemolysis of red blood cells

nd, not determined

**Table S2.** Susceptibility of *Cryptococcus neoformans* strains to the organoselenium compound LQA\_78 and the standard antifungals fluconazole (FLC) and amphotericin B (AMB). The concentration values are expressed in µg/mL.

| Strains | AMB              |                  |       | FLC              |                  |      | LQA_78           |                  |     |
|---------|------------------|------------------|-------|------------------|------------------|------|------------------|------------------|-----|
|         | IC <sub>50</sub> | IC <sub>90</sub> | MFC   | IC <sub>50</sub> | IC <sub>90</sub> | MFC  | IC <sub>50</sub> | IC <sub>90</sub> | MFC |
| H99 NA  | 0.016            | 0.03             | 0.06  | 1                | 2                | 8    | 4                | 8                | 16  |
| H99 A   | 0.016            | 0.03             | 0.06  | 4                | 8                | 64   | 4                | 8                | 16  |
| CAP59   | 0.03             | 0.03             | 0.03  | 0.5              | 1                | 8    | 2                | 4                | 8   |
| L53     | 0.06             | 0.25             | 0.25  | 1                | 2                | 4    | 8                | 16               | 32  |
| L177    | 0.06             | 0.125            | 0.25  | 2                | 4                | 8    | 8                | 16               | 32  |
| L331    | 0.06             | 0.125            | 0.25  | 1                | 2                | 4    | 8                | 16               | 32  |
| L333    | 0.03             | 0.06             | 0.125 | 2                | 4                | 16   | 16               | 32               | 64  |
| L354    | 0.25             | 0.25             | 0.5   | 4                | 8                | 16   | 8                | 16               | 32  |
| L378    | 0.25             | 0.5              | 1     | 2                | 4                | 16   | 16               | 32               | 64  |
| L449    | 0.06             | 0.125            | 0.25  | 2                | 4                | 16   | 16               | 32               | 64  |
| L576    | 0.125            | 0.25             | 0.5   | 2                | 4                | 8    | 16               | 32               | 64  |
| L580    | 0.125            | 0.25             | 0.5   | 2                | 4                | 8    | 16               | 32               | 64  |
| 541     | 0.03             | 0.03             | 0.03  | 0.25             | 0.25             | 0.25 | 1                | 2                | 8   |
| 542     | 0.03             | 0.03             | 0.125 | 4                | 8                | 64   | 1                | 2                | 4   |
| 543     | 0.125            | 0.25             | 1     | 0.25             | 0.25             | 2    | 1                | 4                | 4   |
| 544A    | 0.25             | 0.25             | 0.25  | 1                | 2                | 4    | 4                | 4                | 8   |
| 545A    | 0.125            | 0.25             | 0.5   | 1                | 2                | 8    | 4                | 8                | 8   |

IC<sub>50</sub>, the lowest concentration that inhibits 50% of fungal growth

IC<sub>90</sub>, the lowest concentration that inhibits 90% of fungal growth

MFC, the lowest concentration that kills >99.9% of cells

The assays were performed in duplicate at least three times. The data represent the modal mean.

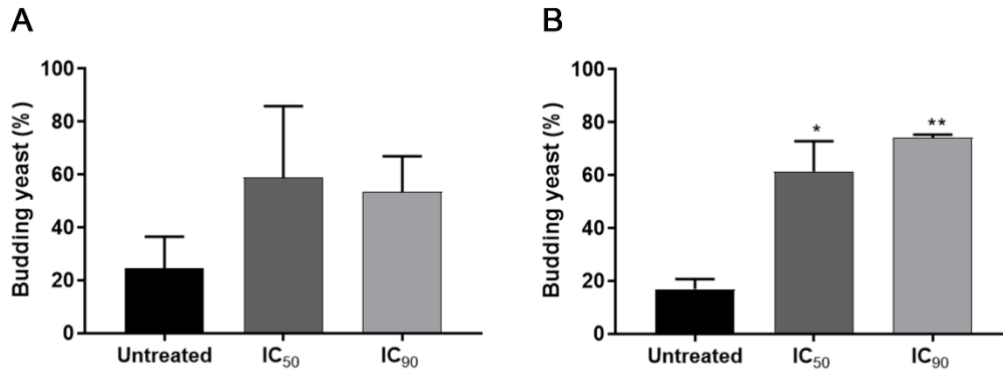

**Figure S1.** The compound LQA\_78 inhibits *Cryptococcus neoformans* growth, resulting in budding yeast accumulation. **(A)** H99 adapted strain and **(B)** clinical isolate L354. \* $p < 0.05$  and \*\* $p < 0.01$  compared to the untreated group (one-way ANOVA with Dunnett's post-test). Two independent experiments were performed in duplicate.

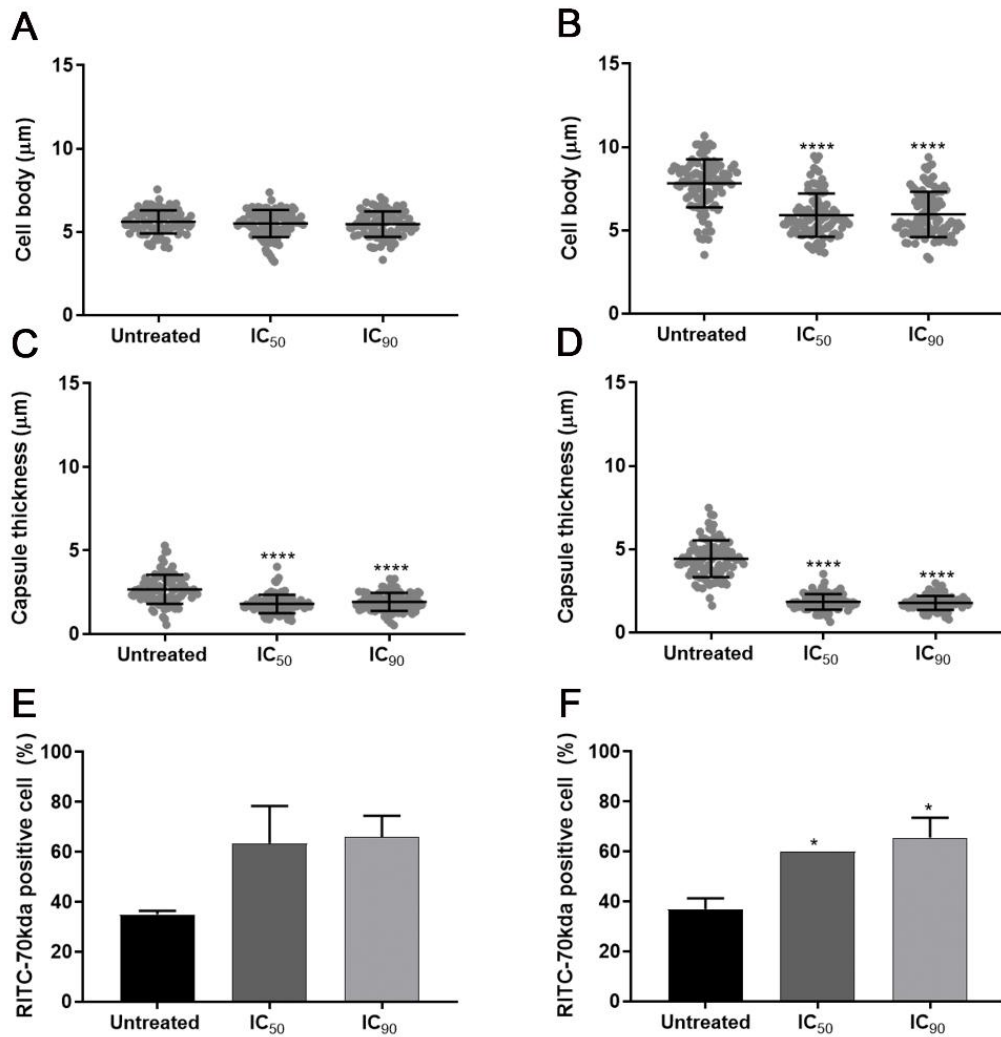

**Figure S2.** Inhibitory effect of LQA\_78 on *Cryptococcus neoformans* H99 adapted strain (left column) and clinical isolate L354 (right column) virulence factors. **(A-B)** Cell diameter, **(C-D)** capsule thickness, **(E-F)** capsule permeability. \* $p < 0.05$  and \*\*\*\* $p < 0.0001$  compared with the untreated group (one-way ANOVA with Dunnett's post-test).  $n = 50-100$  cells. Two independent experiments were performed in duplicate.



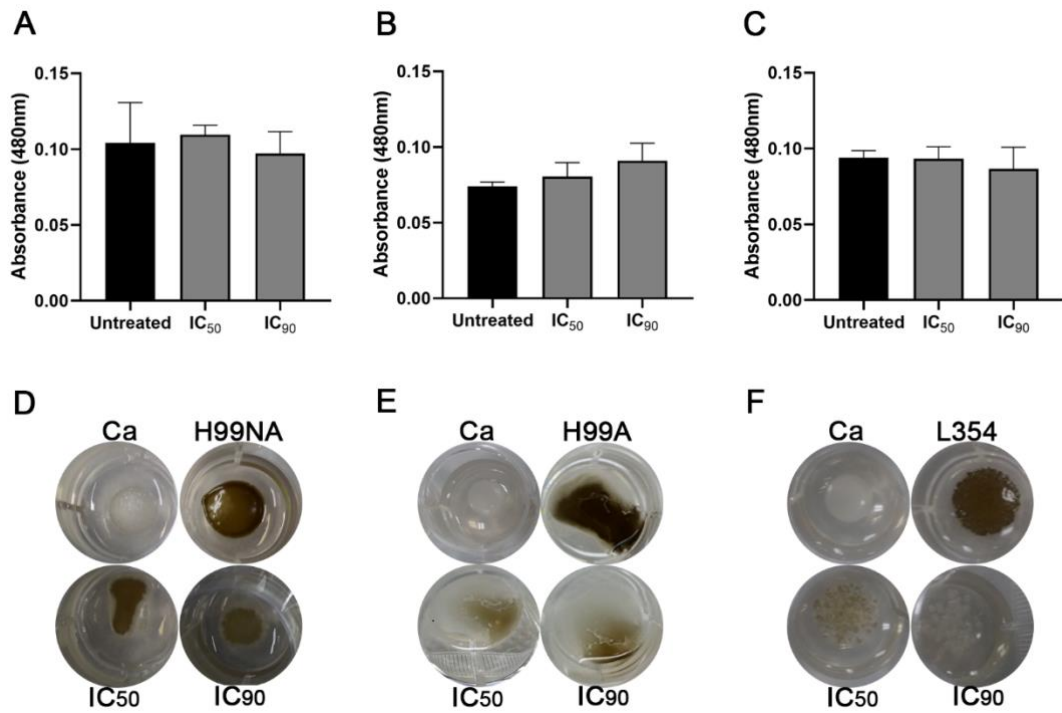

**Figure S3.** Inhibitory effect of LQA\_78 on melanin leakage (A-C) and melanin production (D-F) of *Cryptococcus neoformans* strains after 72 h of incubation at 30°C. (A, D) H99 nonadapted strain, (B, E) H99 adapted strain, and (C, F) clinical isolate L354. Two independent experiments in duplicate (one-way ANOVA with Dunnett's post-test).

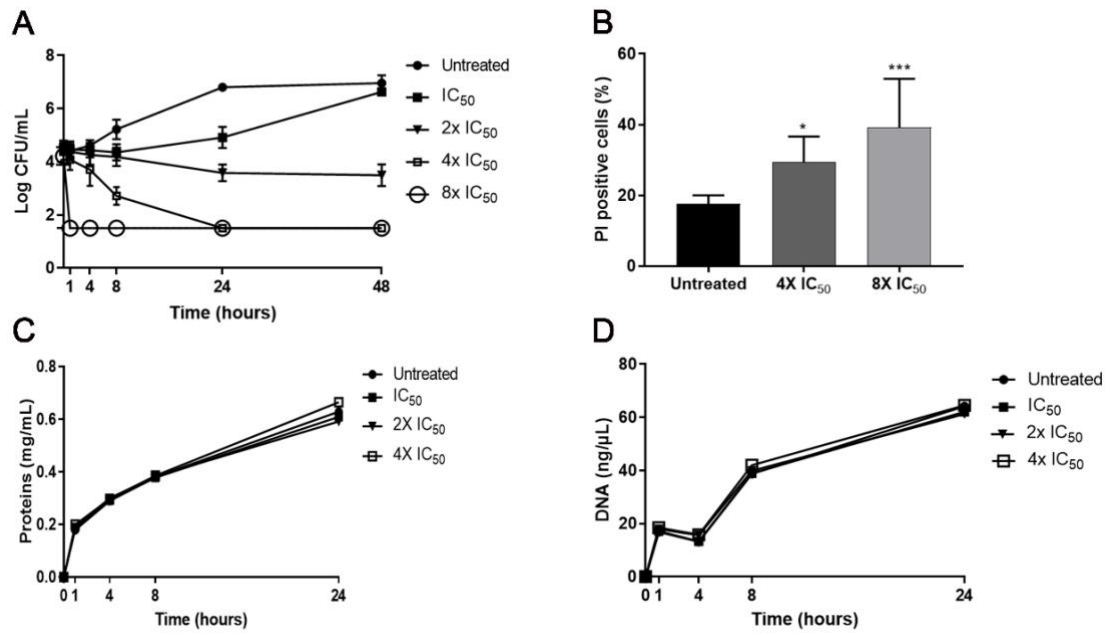

**Figure S4.** Fungicidal effect of LQA\_78 on *Cryptococcus neoformans* H99 (adapted strain). **(A)** Time-kill curve, **(B)** flow cytometry analysis by propidium iodide (PI) after 24 h of incubation with LQA\_78, **(C-D)** quantification of protein **(C)** and DNA **(D)** on supernatant after 0, 1, 4, 8 and 24 h of treatment. \* $p < 0.05$  and \*\*\* $p < 0.001$  compared with the untreated group of three independent experiments [one-way ANOVA with Dunnett's post-test for **(B)** and two-way ANOVA for **(C)** and **(D)**].

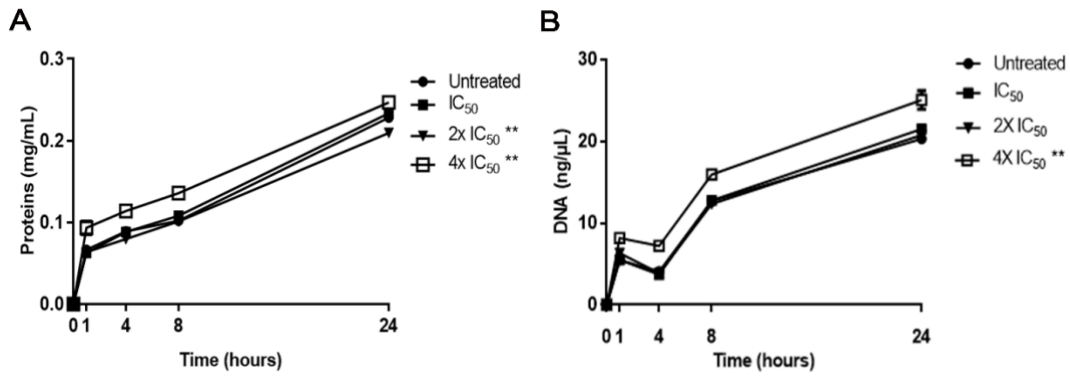

**Figure S5.** Cytoplasm leakage of *Cryptococcus neoformans* H99 (non-adapted strain) treated with LQA\_78. **(A)** Quantification of protein and **(B)** DNA on supernatant after 0, 1, 4, 8 and 24 h of treatment. \*\*p <0.01 compared with the untreated group of three independent experiments (two-way ANOVA with Dunnett's post-test).
